# Supplementary material for: Modulating the electronic interactions via heterostructure engineering for energy-saving hydrogen production at high current densities
Source: Royal Society of Chemistry journal article supplement (doi:10.1039/d4ta07348g), 2024-10-28
Supplement: d4ta07348g1.pdf [file d4ta07348g1.pdf]

Electronic Supplementary Material (ESI) for Chemical Science.

This journal is © The Royal Society of Chemistry 2018

## **Electronic Supplementary Information**

# **Modulating the Electronic Interactions via Heterostructure Engineering for Energy-Saving Hydrogen Production at High Current Densities**

Dongxing Tan\*, Xianfang Yin, Jing Wang, Zixuan Zhang, Xiao Zhu, Hengrui Kang and Yuanyuan Feng\*

*Key Laboratory of Catalytic Conversion and Clean Energy in Universities of Shandong Province, School of Chemistry and Chemical Engineering, Qufu Normal University, Qufu Shandong, 273165, P.R.China.*

\*Correspondence Email: [tandx@qfnu.edu.cn](mailto:tandx@qfnu.edu.cn), [fengyy@qfnu.edu.cn](mailto:fengyy@qfnu.edu.cn).

This PDF file includes:

Experimental Section; Fig. S1 to S15; Table S1.

## Experimental

**Materials.** Nickel nitrate hexahydrate, ammonium molybdate tetrahydrate, N, N-Dimethylformamide (DMF), Potassium hydroxide, absolute ethanol and methanol were provided by Sinopharm Chemical Reagent Beijing Co., Ltd. p-Phthalic acid, tetrafluoroterephthalic acid and nickel foam (NF) were purchased from Aladdin. Pt/C (20 wt% Pt on Vulcan XC-72), RuO<sub>2</sub> and Nafion (5 wt%) were purchased from Sigma-Aldrich. All electrolyte solutions were prepared by using Millipore water (resistivity: ~18.5 MΩ·cm).

**Pre-treatment of NF.** The NF was ultrasonic treated 3 M hydrochloric acid aqueous solution, deionized water and ethanol for 10 min to remove surface oxides and impurities. Finally, the treated NF was stored in ethanol for later use.

**Preparation of electrocatalysts.** Preparation of Ni<sub>0.2</sub>Mo<sub>0.8</sub>N/F,N-C@NF: In a typical synthesis process, appropriate amounts of tetrafluoroterephthalic acid, nickel nitrate hexahydrate and ammonium molybdate tetrahydrate were dispersed into 21 mL of the mixed solution of DMF, ethanol and water (volume ratio= 18:2:1) and stirred at room temperature for 30 min. Next, the solution was transferred into a Teflon liner stainless-steel autoclave, then a piece of NF (2×3 cm<sup>2</sup>) was immersed in the mixed solution and the autoclave was sealed and heated at 140 °C for 12 h. After the autoclave cooled to room temperature, the as-prepared sample was washed with ethanol and dried in a vacuum oven at 80 °C for 24 h. The solid was annealed in tube furnace at 500 °C in NH<sub>3</sub> atmosphere for 2 h with a heating rate of 5 °C min<sup>-1</sup>.

Preparation of Ni<sub>0.2</sub>Mo<sub>0.8</sub>N/N-C@NF: The preparation process of Ni<sub>0.2</sub>Mo<sub>0.8</sub>N/N-C@NF is similar to that of Ni<sub>0.2</sub>Mo<sub>0.8</sub>N/F,N-C@NF, except that tetrafluoroterephthalic acid is replaced by p-Phthalic acid.

Preparation of Ni<sub>3</sub>N/F,N-C@NF: The preparation process of Ni<sub>3</sub>N/F,N-C@NF is similar to that of Ni<sub>0.2</sub>Mo<sub>0.8</sub>N/F,N-C@NF, but without ammonium molybdate tetrahydrate.

Preparation of Ni<sub>3</sub>N/N-C@NF: The preparation process of Ni<sub>3</sub>N/N-C@NF is similar to that of Ni<sub>3</sub>N/F,N-C@NF, but without ammonium molybdate tetrahydrate.

Fabrication of Pt/C@NF and RuO<sub>2</sub>@NF electrodes: The Pt/C@NF and RuO<sub>2</sub>@NF electrodes were prepared by loading samples suspension onto NF. Briefly, the Pt/C, RuO<sub>2</sub> and 10 μL Nafion D-521 dispersion were dispersed in absolute ethanol and ultrasonicated for 1 h to form uniform suspension, and the suspension was loaded on the NF, respectively. The electrode was dried in a vacuum oven at 80 °C for 6 h before electrochemical experiment.

**Characterizations.** The morphologies of the catalysts were characterized by SEM (HITACHI S-4800). TEM images were taken on JEOL JEM-EM-1011 and JEOL JEM-2100F field-emission high-resolution transmission electron microscope operated at 200 kV. XRD patterns were conducted on a Rigaku D/max 2400 diffractometer with Cu Ka radiation (λ= 0.15418 nm). XPS was carried out with a multipurpose X-ray photoemission spectroscope (Thermo Scientific ESCALAB 250Xi).

A CHI660E electrochemical analyzer (Shanghai Chenhua instrument co. LTD, China) was used in all the electrochemical experiments. All electrochemical experiments were carried out in a three-electrode system. The reference and counter electrodes are Hg/HgO and graphite rod, respectively. All experiments were measured at atmospheric pressure and room temperature. All working electrodes were used for electrochemical experiments with a fixed working area of 0.25 cm<sup>2</sup>. Before electrochemical testing, the working electrodes were activated by cyclic voltammetry of 50 sweep segments in electrolyte to generate stable active species. Linear Sweep Voltammetry (LSV) was performed in 1.0 M KOH with/without 0.5 M methanol solution. All potentials reported in this paper are with respect to reversible hydrogen electrode (RHE), which were converted by Equation 1.

Potential in RHE= Applied potential vs Hg/HgO + 0.098 + 0.0592pH (Equation 1).

**Solar-driven electrochemical system.** Unassisted solar-driven electrocatalytic reaction was achieved using a photovoltaic cell. The surface area of the photovoltaic cell was 3 cm × 3 cm, and the surface areas of the anodes and cathodes were both 1 cm<sup>2</sup>. The device was illuminated with standard AM 1.5G solar light at room temperature, and operated at a voltage of 2.0 V (the intersection point of the current-voltage curves of the photovoltaic cell and integrated electrolysis cell). The electrochemical working station was wired in series (with 0 V applied) to monitor the current.

**DFT calculations.** All spin-polarized DFT calculations were carried out using the Vienna ab initio simulation package (VASP).<sup>1,2</sup> The Perdew-Burke-Ernzerhof (PBE) exchange-correction functional within the generalized gradient approximation (GGA) was employed to describe the exchange-correlation potential.<sup>3,4</sup> The DFT-D3 approach was applied to describe van der Waals (vdW) interactions.<sup>5</sup> A vacuum distance of 20 Å was employed to avoid interactions between periodic images. The cut-off energy of the plane wave basis was set to 450 eV. The energy and force convergence criteria were set to be 10<sup>-4</sup> eV and 0.01 eV Å<sup>-1</sup>, respectively. The Brillouin zone was sampled with a 1×1×1 by Gamma centered grids. Based on the experimental results, a three-layer slab repeated in a p(3×4) Ni<sub>0.2</sub>Mo<sub>0.8</sub>N(100) supercell with one layer of F,N-C@NF or N-C@NF at the bottom was built as Ni<sub>0.2</sub>Mo<sub>0.8</sub>N/F,N-C@NF or Ni<sub>0.2</sub>Mo<sub>0.8</sub>N/N-C@NF. A p(2×2) Ni<sub>3</sub>N(100) supercell with one layer of F,N-C@NF or N-C@NF at the bottom was built as Ni<sub>3</sub>N/F,N-C@NF or Ni<sub>3</sub>N/N-C@NF.

The d-band center of Mo or Ni atom was calculated by the equation,

$$\varepsilon_d = \frac{\int_{-\infty}^{+\infty} \rho_d(E) E dE}{\int_{-\infty}^{+\infty} \rho_d(E) dE}$$

where  $\rho_d$  and  $E$  represent the projected density of states of the d orbitals of the Mo or Ni atom and the energy about the Fermi level, respectively. The adsorption energy ( $E_{ads}$ ) of the adsorbed \*OH<sub>2</sub> on the Ni<sub>0.2</sub>Mo<sub>0.8</sub>N/F,N-C@NF, Ni<sub>0.2</sub>Mo<sub>0.8</sub>N/N-C@NF, Ni<sub>3</sub>N/F,N-C@NF or Ni<sub>3</sub>N/N-C@NF is expressed by  $E_{ads} = E_{total} - E_{H_2O} - E_{catalyst}$  in which  $E_{total}$ ,  $E_{H_2O}$  and  $E_{catalyst}$  denote the total energies of the adsorbed \*OH<sub>2</sub>, the isolated H<sub>2</sub>O, and the Ni<sub>0.2</sub>Mo<sub>0.8</sub>N/F,N-C@NF, Ni<sub>0.2</sub>Mo<sub>0.8</sub>N/N-C@NF, Ni<sub>3</sub>N/F,N-C@NF or Ni<sub>3</sub>N/N-C@NF, respectively. The bonding/anti-bonding population between the catalysts and intermediates was analyzed using the projected crystal orbital Hamilton population (pCOHP).<sup>6</sup> According to the computational hydrogen electrode (CHE) model,<sup>7</sup> the Gibbs free energy ( $\Delta G_{H^*}$ ) was defined as:  $\Delta G_{H^*} = \Delta E_{H^*} + \Delta ZPE -$

$T\Delta S$ , where  $\Delta E_{H^*}$  is the adsorption energy of  $H^*$  adsorption,  $\Delta ZPE$  and  $\Delta S$  are the differences in the zero-point energy and entropy.  $T$  is the room temperature of 298.15 K.

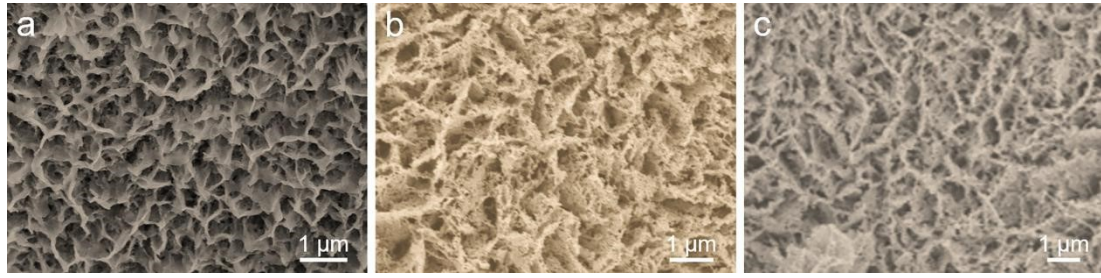

**Fig. S1** SEM images of (a)  $\text{Ni}_{0.2}\text{Mo}_{0.8}\text{N}/\text{N-C@NF}$ , (b)  $\text{Ni}_3\text{N}/\text{F,N-C@NF}$  and (c)  $\text{Ni}_3\text{N}/\text{N-C@NF}$ .

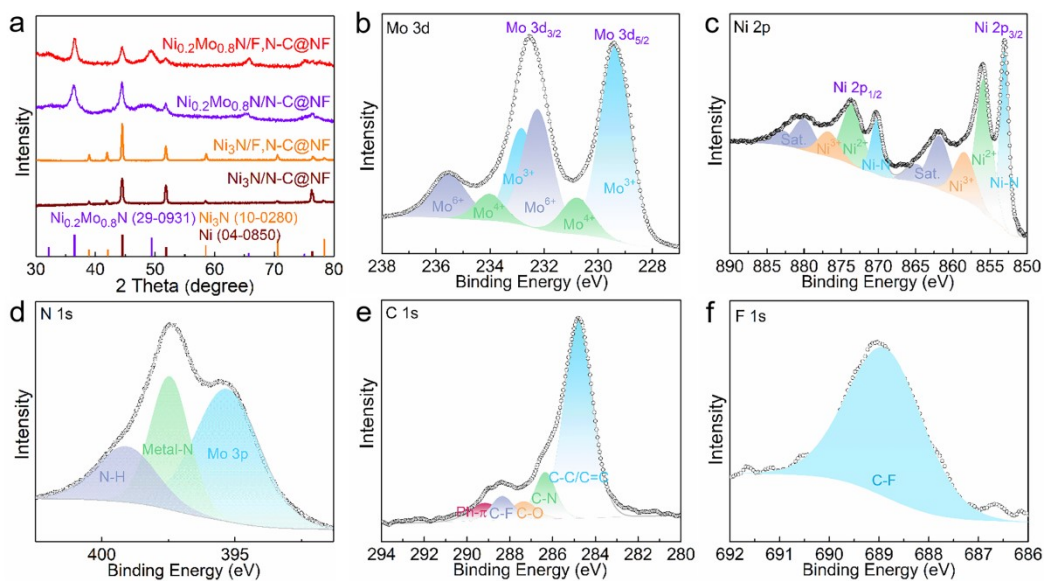

**Fig. S2** (a) XRD patterns of prepared catalysts. High-resolution XPS spectra of (b) Mo 3d, (c) Ni 2p, (d) N 1s, (e) C 1s and (f) F 1s of  $\text{Ni}_{0.2}\text{Mo}_{0.8}\text{N}/\text{F},\text{N-C@NF}$ .

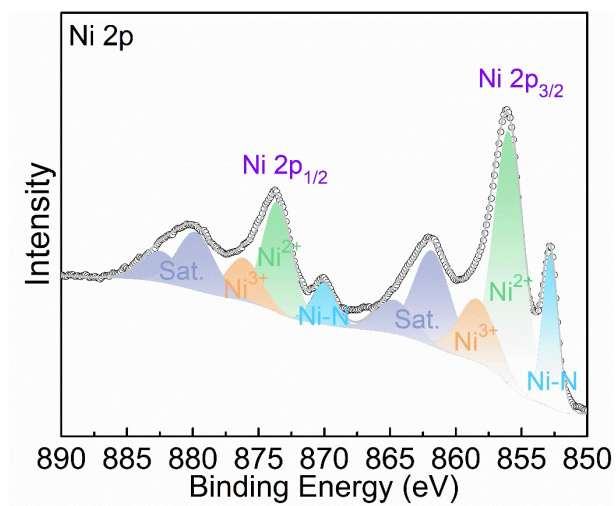

**Fig. S3** High-resolution XPS spectra of Ni 2p of Ni<sub>3</sub>N/N-C@NF.

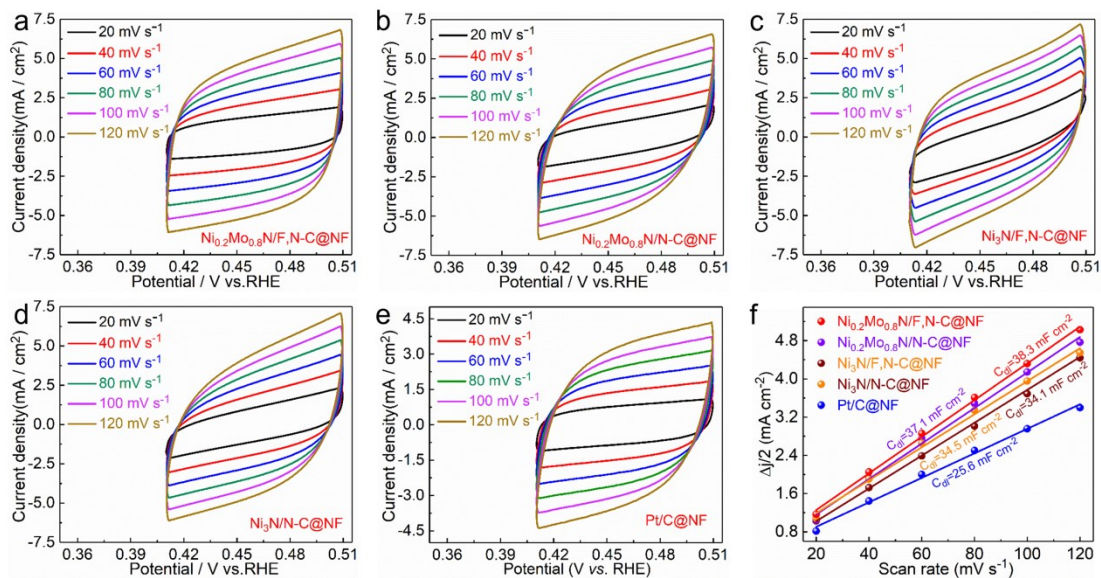

**Fig. S4** CV curves acquired at various scan rates in 1.0 M KOH solution of (a)  $\text{Ni}_{0.2}\text{Mo}_{0.8}\text{N}/\text{F,N-C@NF}$ , (b)  $\text{Ni}_3\text{N}/\text{F,N-C@NF}$ , (c)  $\text{Ni}_{0.2}\text{Mo}_{0.8}\text{N}/\text{N-C@NF}$  (d)  $\text{Ni}_3\text{N}/\text{N-C@NF}$  and (e)  $\text{Pt}/\text{C@NF}$ . (f) The double-layer capacitances derived from the CV curves at various scan rates.



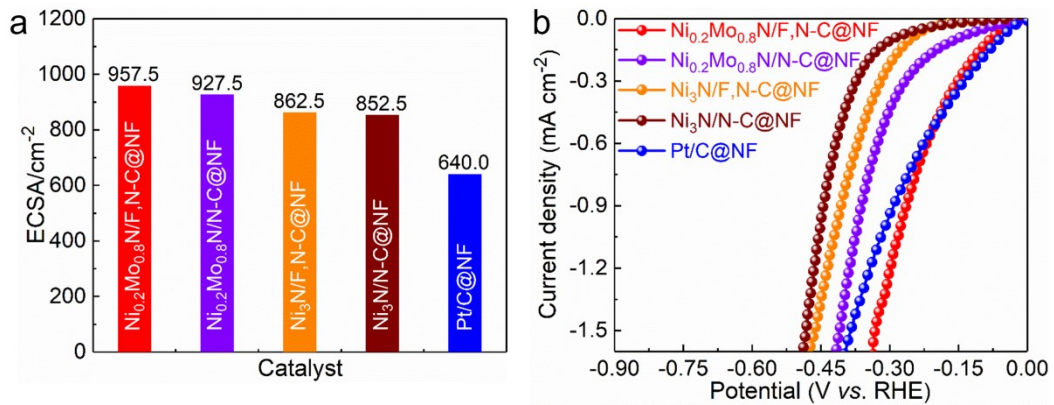

**Fig. S5** (a) The electrochemical active areas of  $\text{Ni}_{0.2}\text{Mo}_{0.8}\text{N/F,N-C@NF}$ ,  $\text{Ni}_{0.2}\text{Mo}_{0.8}\text{N/N-C@NF}$ ,  $\text{Ni}_3\text{N/F,N-C@NF}$ ,  $\text{Ni}_3\text{N/N-C@NF}$  and  $\text{Pt/C@NF}$ . (b) HER polarization curves normalized by ECSA for  $\text{Ni}_{0.2}\text{Mo}_{0.8}\text{N/F,N-C@NF}$ ,  $\text{Ni}_{0.2}\text{Mo}_{0.8}\text{N/N-C@NF}$ ,  $\text{Ni}_3\text{N/F,N-C@NF}$ ,  $\text{Ni}_3\text{N/N-C@NF}$  and  $\text{Pt/C@NF}$ .

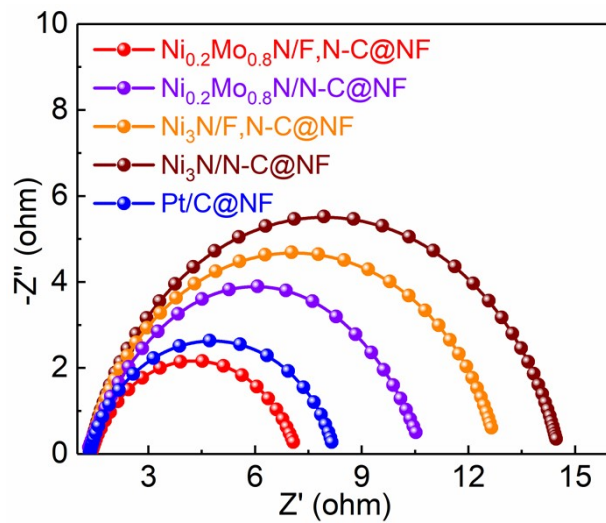

**Fig. S6** Nyquist plots for  $\text{Ni}_{0.2}\text{Mo}_{0.8}\text{N}/\text{F},\text{N-C@NF}$ ,  $\text{Ni}_{0.2}\text{Mo}_{0.8}\text{N}/\text{N-C@NF}$ ,  $\text{Ni}_3\text{N}/\text{F},\text{N-C@NF}$  and  $\text{Ni}_3\text{N}/\text{N-C@NF}$ .

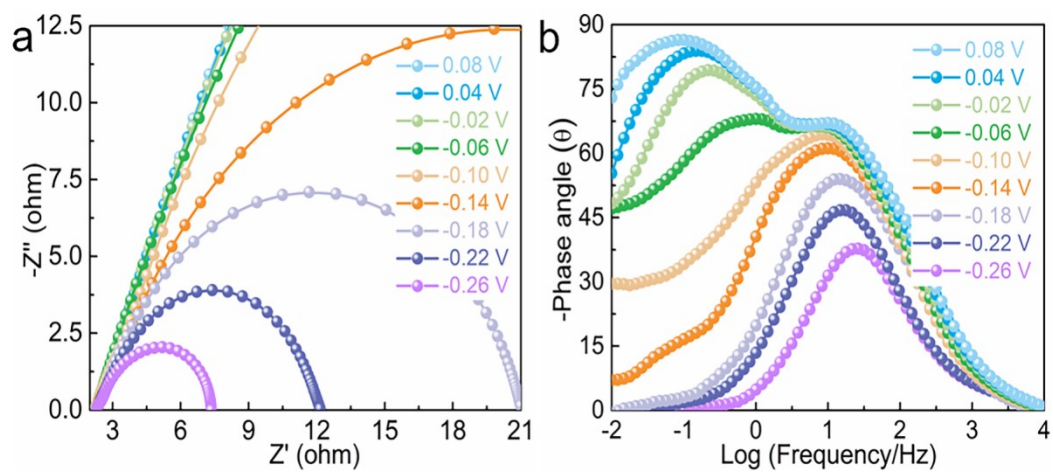

**Fig. S7** (a) Nyquist and (b) Bode plots for Ni<sub>3</sub>N/N-C@NF.

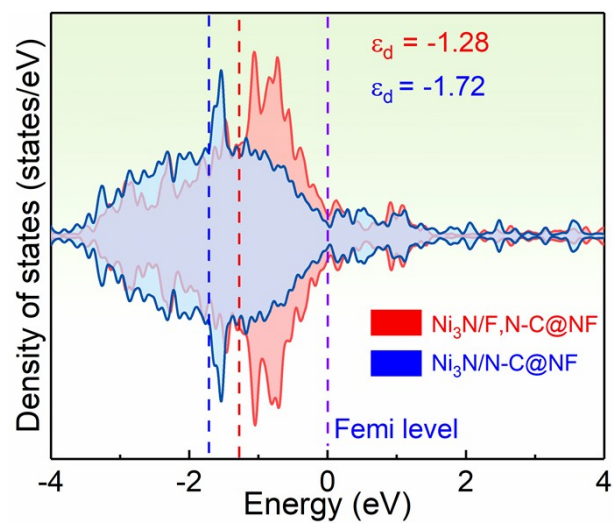

**Fig. S8** Density of states (DOS) of  $\text{Ni}_3\text{N}/\text{F},\text{N-C@NF}$  and  $\text{Ni}_3\text{N}/\text{N-C@NF}$ .

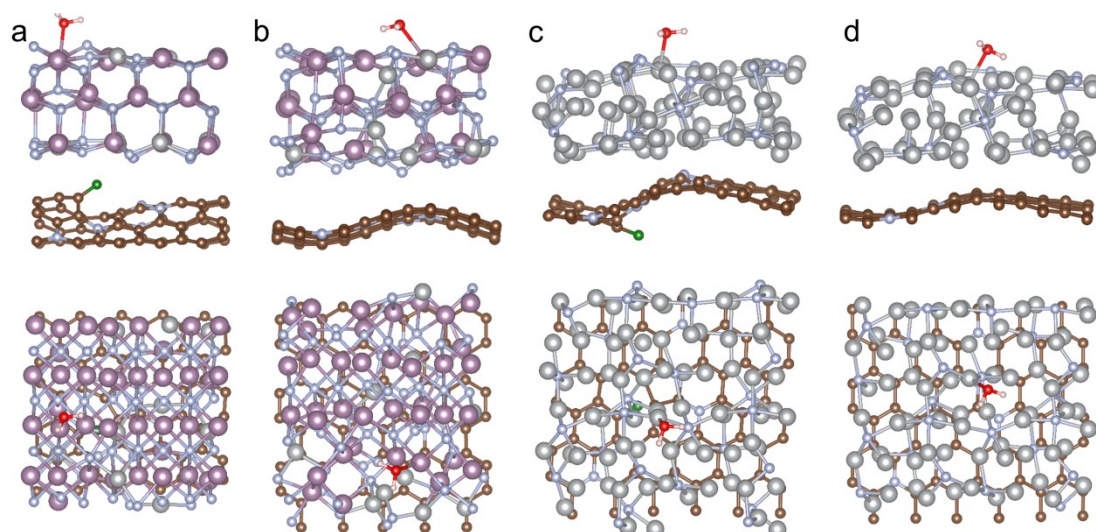

**Fig. S9** The geometric configurations of the  $^*OH_2$  adsorbed on  $Ni_{0.2}Mo_{0.8}N/F,N-C@NF$ ,  $Ni_{0.2}Mo_{0.8}N/N-C@NF$ ,  $Ni_3N/F,N-C@NF$  and  $Ni_3N/N-C@NF$ .

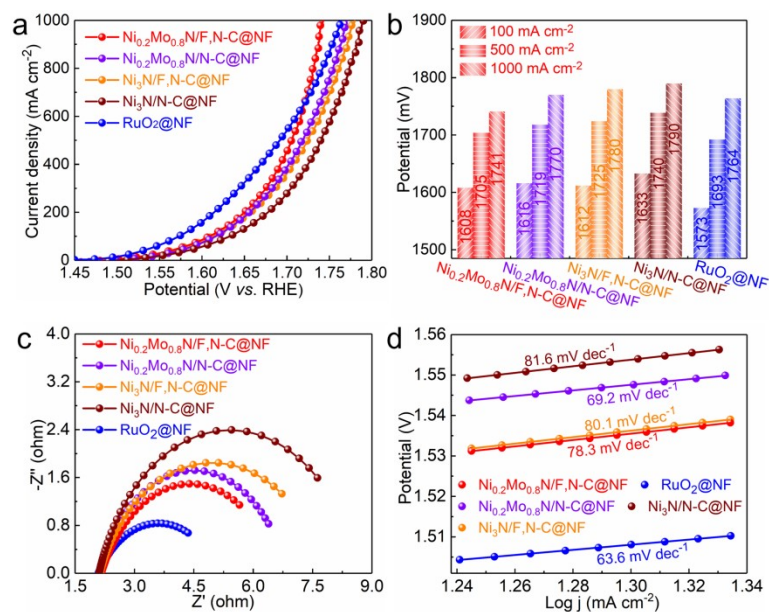

**Fig. S10** (a) LSV curves of the catalysts and commercial RuO<sub>2</sub>@NF in 1.0 M KOH solution with a scan rate of 5 mV s<sup>-1</sup>. (b) Comparison of the potentials at 100, 500 and 1000 mA cm<sup>-2</sup>, (c) the EIS Nyquist plots, (d) the corresponding Tafel slopes of the catalysts and commercial RuO<sub>2</sub>@NF.

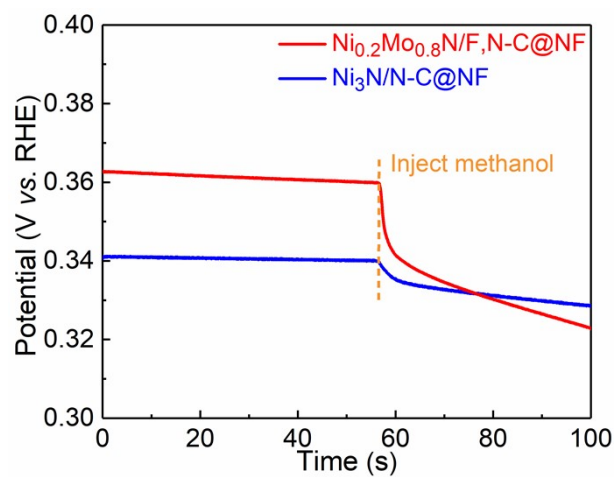

**Fig. S11** The OCP of the  $\text{Ni}_{0.2}\text{Mo}_{0.8}\text{N/F,N-C@NF}$  and  $\text{Ni}_3\text{N/N-C@NF}$  in 1.0 M KOH solution before and after methanol was injected.

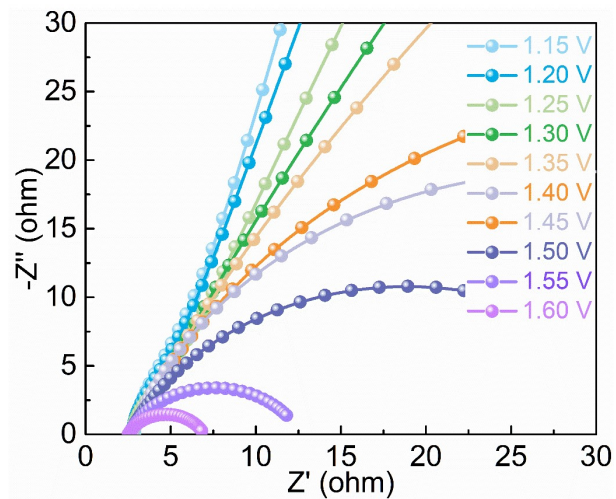

**Fig. S12** The potential-dependent Nyquist of  $\text{Ni}_{0.2}\text{Mo}_{0.8}\text{N}/\text{F},\text{N-C@NF}$  for OER.



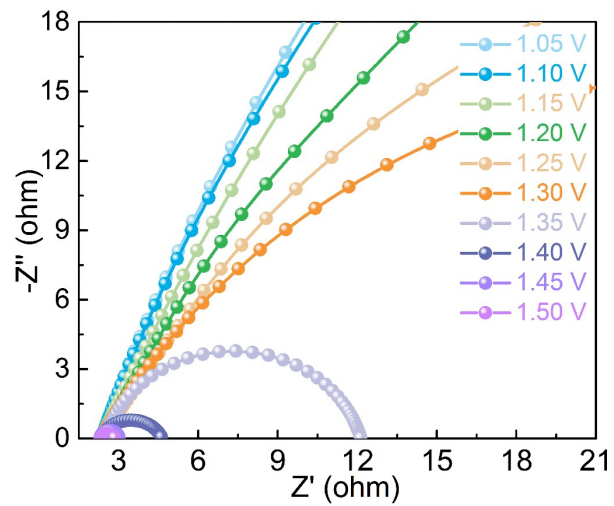

**Fig. S13** The potential-dependent Nyquist of  $\text{Ni}_{0.2}\text{Mo}_{0.8}\text{N}/\text{F}, \text{N-C@NF}$  for MOR.

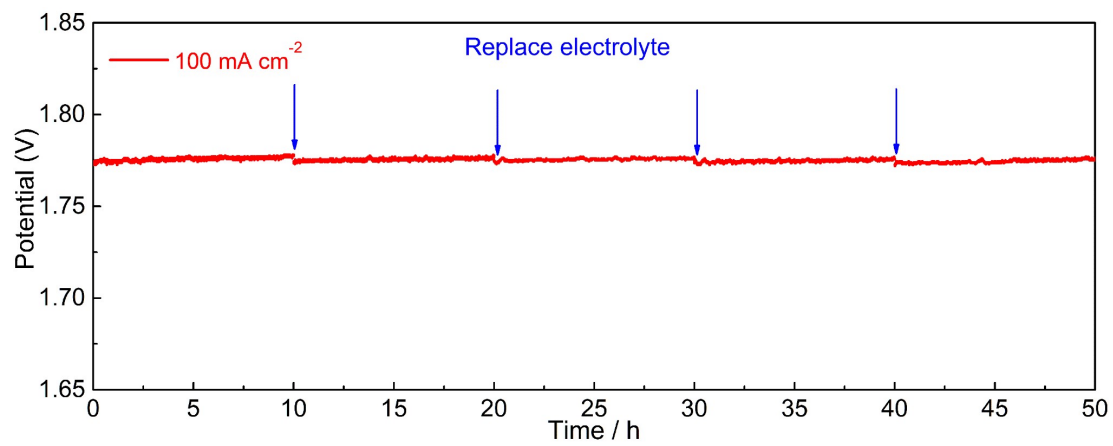

**Fig. S14** The chronopotentiometry curve of the  $\text{Ni}_{0.2}\text{Mo}_{0.8}\text{N}/\text{F},\text{N-C@NF}$  under a current density of  $100 \text{ mA cm}^{-2}$ .

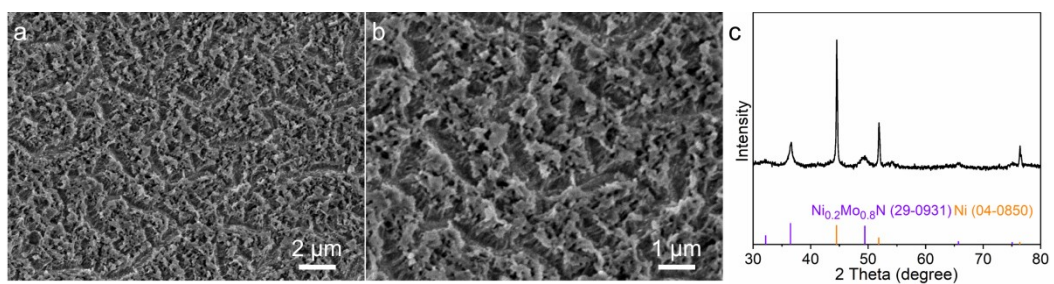

**Fig. S15** (a, b) SEM images and (c) XRD pattern of Ni<sub>0.2</sub>Mo<sub>0.8</sub>N/F,N-C@NF after stability testing.

**Table S1** Comparison of the HER activity of Ni<sub>0.2</sub>Mo<sub>0.8</sub>N/F,N-C@NF with other published electrocatalysts.

| Catalyst                                                           | Current density (mA cm <sup>-2</sup> ) | Overpotential (mV) | Reference |
|--------------------------------------------------------------------|----------------------------------------|--------------------|-----------|
| Ni <sub>0.2</sub> Mo <sub>0.8</sub> N/F,N-C@NF                     | 100                                    | 83                 | This work |
|                                                                    | 500                                    | 204                |           |
|                                                                    | 1000                                   | 281                |           |
| MnO-CoP/NF                                                         | 100                                    | 94.5               | 8         |
|                                                                    | 500                                    | 186.2              |           |
|                                                                    | 1000                                   | 259.5              |           |
| Cu-FeOOH/Fe <sub>3</sub> O <sub>4</sub>                            | 100                                    | 129                | 9         |
|                                                                    | 500                                    | 285                |           |
|                                                                    | 1000                                   | 349                |           |
| Ni <sub>3</sub> S <sub>2</sub> /Cr <sub>2</sub> S <sub>3</sub> @NF | 100                                    | 160                | 10        |
|                                                                    | 500                                    | 207                |           |
|                                                                    | 1000                                   | 267                |           |
| NMFSOH                                                             | 100                                    | 128                | 11        |
|                                                                    | 500                                    | 175                |           |
|                                                                    | 1000                                   | 200                |           |
| Ni <sub>0.96</sub> Co <sub>0.04</sub> P/NF                         | 500                                    | 161                | 12        |
|                                                                    | 1000                                   | 251                |           |
| Ni@NCW-2.0                                                         | 100                                    | 239                | 13        |
|                                                                    | 500                                    | 385                |           |
| Ni <sub>2</sub> P-NiMoOx/NF                                        | 100                                    | 188                | 14        |
|                                                                    | 500                                    | 297                |           |
| Ru-Mo <sub>2</sub> C@CNT                                           | 100                                    | 90                 | 15        |
| Ni <sub>3</sub> N-C@NFo <sub>3</sub> N                             | 100                                    | 120                | 16        |
| Ni(OH) <sub>2</sub> @Ni-N/Ni-C                                     | 100                                    | 113                | 17        |
| PtSA-NiSe-V                                                        | 100                                    | 109                | 18        |
| NiCoP                                                              | 100                                    | 148                | 19        |
| CoMnP-NPC/CC                                                       | 100                                    | 114                | 20        |
| Cr-Ni <sub>3</sub> N                                               | 100                                    | 158                | 21        |
| NiFeV@FeO <sub>x</sub> /IF                                         | 100                                    | 105                | 22        |
| NF/O-CoP                                                           | 100                                    | 122.4              | 23        |
| Co/CoMoN/NF                                                        | 100                                    | 173                | 24        |
| Ni <sub>2</sub> P-CoCH/CFP                                         | 100                                    | 143                | 25        |
| FeWO <sub>4</sub> -Ni <sub>3</sub> S <sub>2</sub> /NF              | 1000                                   | 343                | 26        |

## References

- 1 G. Kresse and J. Furthmüller, *Phys. Rev. B*, 1996, **54**, 11169–11186.
- 2 G. Kresse and J. Hafner, *Phys. Rev. B*, 1993, **47**, 558–561.
- 3 J. Perdew, K. Burke and M. Ernzerhof, *Phys. Rev. Lett.*, 1996, **77**, 3865–3868.
- 4 P. Blöchl, *Phys. Rev. B*, 1994, **50**, 17953–17979.
- 5 S. Grimme, J. Antony, S. Ehrlich and H. Krieg, *J. Chem. Phys.*, 2010, **132**, 154104.
- 6 S. Maintz, V. Deringer, A. Tchougréeff and R. Dronskowski, *J. Comput. Chem.*, 2016, **37**, 1030–1035.
- 7 J. Nørskov, J. Rossmeisl, A. Logadottir, L. Lindqvist, J. Kitchin, T. Bligaard and H. Jónsson, *J. Phys. Chem. B*, 2004, **108**, 17886–17892.
- 8 Y. Dong, Z. Deng, H. Zhang, G. Liu and X. Wang, *Nano Lett.*, 2023, **23**, 9087–9095.
- 9 C. Yang, W. Zhong, K. Shen, Q. Zhang, R. Zhao, H. Xiang, J. Wu, X. Li and N. Yang, *Adv. Energy Mater.*, 2022, **12**, 2200077.
- 10 H. Q. Fu, M. Zhou, P. F. Liu, P. Liu, H. Yin, K. Z. Sun, H. G. Yang, M. Al-Mamun, P. Hu, H.-F. Wang and H. Zhao, *J. Am. Chem. Soc.*, 2022, **144**, 6028–6039.
- 11 P. Fang, M. Zhu, J. Liu, Z. Zhu, J. Hu and X. Xu, *Adv. Energy Mater.*, 2023, **13**, 2301222.
- 12 X. Lv, S. Wan, T. Mou, X. Han, Y. Zhang, Z. Wang and X. Tao, *Adv. Funct. Mater.*, 2023, **33**, 2205161.
- 13 D. Li, H. Cheng, X. Hao, G. Yu, C. Qiu, Y. Xiao, H. Huang, Y. Lu and B. Zhang, *Adv. Mater.*, 2023, **36**, 2304917.
- 14 J. Ren, L. Chen, H. Wang, W. Tian, X. Song, Q. Kong and Z. Yuan, *ACS Catal.*, 2023, **13**, 9792–9805.
- 15 X. Wu, Z. Wang, D. Zhang, Y. Qin, M. Wang, Y. Han, T. Zhan, B. Yang, S. Li, J. Lai and L. Wang, *Nat. Commun.*, 2021, **12**, 4018.
- 16 Q. Qian, J. Zhang, J. Li, Y. Li, X. Jin, Y. Zhu, Y. Liu, Z. Li, A. El-Harairy, C. Xiao, G. Zhang and Y. Xie, *Angew. Chem., Int. Ed.*, 2021, **60**, 5984–5993.
- 17 K. Dastafkan, X. Shen, R. K. Hocking, Q. Meyer and C. Zhao, *Nat. Commun.*, 2023, **14**, 547.
- 18 Z. Chen, X. Li, J. Zhao, S. Zhang, J. Wang, H. Zhang, J. Zhang, Q. Dong, W. Zhang, W. Hu and X. Han, *Angew. Chem., Int. Ed.*, 2023, **62**, e202308686.
- 19 G. Ma, J. Ye, M. Qin, T. Sun, W. Tan, Z. Fan, L. Huang and X. Xin, *Nano Energy*, 2023, **115**, 108679.
- 20 Y. Xu, S. Wei, L. Gan, L. Zhang, F. Wang, Q. Wu, X. Cui and W. Zheng, *Adv. Funct. Mater.*, 2022, **32**, 2112623.
- 21 S. Li, S. Wang, J. He, K. Li, Y. Xu, M. Wang, S. Zhao, Y. Wang, X. Li, X. Zhong and J. Wang, *Angew. Chem., Int. Ed.*, 2023, **62**, e202306553.
- 22 H. Yao, F. Le, W. Jia, Y. Cao, R. Sheng, Z. Lu, X. Chen and D. Jia, *Small*, 2023, **19**, 2301294.
- 23 Y. Dong, Z. Deng, Z. Xu, G. Liu and X. Wang, *Small Methods*, 2023, **7**, 2300071.
- 24 H. Ma, Z. Chen, Z. Wang, C. V. Singh and Q. Jiang, *Adv. Sci.*, 2022, **9**, 2105313.
- 25 S. Zhang, C. Tan, R. Yan, X. Zou, F. Hu, Y. Mi, C. Yan and S. Zhao, *Angew. Chem., Int. Ed.*, 2023, **62**, e202302795.
- 26 Z. Wang, G. Qian, T. Yu, J. Chen, F. Shen, L. Luo, Y. Zou and S. Yin, *Chem. Eng. J.*, 2022, **434**, 134669.
